# Supplementary material
Source: ML conference proceedings conference paper supplement (https://proceedings.neurips.cc/paper_files/paper/2020/hash/229aeb9e2ae66f2fac1149e5240b2fdd-Abstract.html)
Supplement: Supplementary file [file 229aeb9e2ae66f2fac1149e5240b2fdd-Supplemental.pdf]

## A Proof of Proposition 1

Note that in problem (7) the term  $(a_{ii} - d_i d_i / (2m)) v_i^T v_i$  is constant because  $\|v_i\| = 1$ . Thus, in the subproblem  $Q(v_i)$  for variable  $v_i$ , we can ignore the constant term and write the gradient  $\nabla Q(v_i)$  as

$$\nabla Q(v_i) = \frac{1}{2m} \sum_{j \neq i} \left( a_{ij} - \frac{d_i d_j}{2m} \right) v_j. \quad (13)$$

Further, since there is no  $v_i$  term in  $\nabla Q(v_i)$ , the objective function  $Q(v_i)$  for the subproblem of variable  $v_i$  becomes  $q^T v_i$  with  $q = \nabla Q(v_i)$ , up to a constant. For simplicity, denote  $v_i$  as  $v$ , and the subproblem reduces to

$$\underset{v}{\text{maximize}} \quad q^T v, \quad \text{s.t. } v \in \mathbb{R}_+^r, \quad \|v\| = 1, \quad \text{card}(v) \leq k. \quad (14)$$

Let  $v^*$  be the optimal solution of the above subproblem (8) (existence by compactness). When  $q \leq 0$ , we have  $\max(q) \leq 0$ . With  $\|v\|_2 = 1$ ,  $v \geq 0$ , and  $\|v\|_2 \leq \|v\|_1$ , there is

$$\max(q) = \max(q) \|v\|_2 \geq \max(q) \|v\|_1 = \max(q) \sum_t v_t \geq \sum_t q_t v_t = q^T v. \quad (15)$$

Thus,  $e(t)$  with the max  $q_t$  is the optimal solution in the first case. For the second case, there is at least one coordinate  $p$  such that  $q_p > 0$ . Now we exclude the following two cases of inactive coordinates by contradictions.

**(When  $q_t < 0$ )** We know  $v_t^* = 0$ . Otherwise, suppose there is a  $v_t^* > 0$  with  $q_t < 0$ .

If  $q^T v^* \leq 0$ , selecting  $v^* = e(p)$  violates the optimality of  $v^*$ , a contradiction.

If  $q^T v^* > 0$ , we have

$$0 < q^T v^* < q^T (v^* - e(t)v_t^*) \leq q^T (v^* - e(t)v_t^*) / \|v^* - e(t)v_t^*\|, \quad (16)$$

also a contradiction to the optimality of  $v^*$ , because the last term is a feasible solution.

**(When  $q_t < q_{[k]}$ , where  $q_{[k]}$  is the  $k$ -th largest value)** We know  $v_t^* = 0$ . Otherwise, there must be a coordinate  $j$  in the top- $k$ -largest value that is not selected ( $v_j^* = 0$ ) because  $\text{card}(v^*) \leq k$ . This way, we have

$$q^T v^* < q^T (v^* - e(t)v_t^* + e(j)v_t^*), \quad (17)$$

which contradicts to the optimality of  $v^*$  because  $(v^* - e(t)v_t^* + e(j)v_t^*)$  is a feasible solution.

Thus, by removing the inactive coordinates, the effective objective function  $q^T v^*$  becomes  $\text{top}_k^+(q)^T v^*$ , and the optimal solution follows from  $\|v_i^*\| = 1$  and  $\text{top}_k^+(q) \geq 0$ .  $\square$

## B Proof of Theorem 2

Define the projected gradient (for maximization) as

$$\text{grad}(V) = P_\Omega(V + \nabla Q(V)) - V, \quad (18)$$

where  $P_\Omega$  is the projection (under 2-norm) to the constraint set  $\Omega$  of the optimization problem (7)

$$\Omega = \{V \mid v_i \in \mathbb{R}_+^r, \|v_i\| = 1, \text{card}(v_i) \leq k, \forall i = 1, \dots, n\}, \quad (19)$$

and denote  $\Omega_i$  as the constraint for  $v_i$  for the separable  $\Omega$ . Because the cardinality constraint is an union between finite hyperplanes, it is a closed set, which implies the constraint of the optimization problem is a compact set. Thus, by the Weierstrass extreme value theorem, the function  $Q(V)$  is upper-bounded and must attain global maximum over the constraint.

Now we connect the exact update in the Locale algorithm with the projected gradient. Denote  $v_i^+$  as the update taken for the subproblem  $Q(v_i)$ . Because the Locale algorithm performs an exact update (Proposition 1), we have

$$\nabla Q(v_i)^T v_i^+ \geq \nabla Q(v_i)^T u, \forall u \in \Omega_i. \quad (20)$$

Further, because  $\|v_i^+\|^2 = 1$  and  $\|u\|^2 = 1$ , we have

$$\|v_i^+ - \nabla Q(v_i)\|^2 \leq \|u - \nabla Q(v_i)\|^2, \forall u \in \Omega_i. \quad (21)$$

This means that the update  $v_i^+$  is the projection of  $\nabla Q(v_i)$  to the constraint set  $\Omega_i$ . To connect the update with the projected gradient, we need the following lemma.

**Lemma 4.** *Denote the projection (under 2-norm) of a point  $x$  on a closed constraint set  $\Omega$  as  $P_\Omega(x)$ . Then for any scalar  $\alpha > 1$  and vector  $q$ , we have*

$$q^T (P_\Omega(x + \alpha q) - P_\Omega(x + q)) \geq 0$$

The proof is listed in Appendix C. Taking the lemma with  $\alpha \rightarrow \infty$  and let  $q = \nabla Q(v_i)$ , we have

$$0 \leq \lim_{\alpha \rightarrow \infty} q^T (P_{\Omega_i}(v_i + \alpha q) - P_{\Omega_i}(v_i + q)) = q^T (v_i^+ - P_{\Omega_i}(v_i + q)), \quad (22)$$

where the last equation follows because  $v_i^+$  is the projection of  $q$  on  $\Omega_i$  with  $\|\cdot\| = 1$  constraint<sup>4</sup>. Further, apply the definition of projection  $P_{\Omega_i}(v_i + q)$  again on the feasible  $v_i$ , we have

$$\|P_{\Omega_i}(v_i + q) - (v_i + q)\|^2 \leq \|v_i - (v_i + q)\|^2, \quad (23)$$

and after rearranging there is

$$\|P_{\Omega_i}(v_i + q) - v_i\|^2 \leq 2q^T (P_{\Omega_i}(v_i + q) - v_i). \quad (24)$$

Applying (22) to the equation above, we have

$$\|P_{\Omega_i}(v_i + q) - v_i\|^2 \leq 2q^T (v_i^+ - v_i). \quad (25)$$

The right hand side of the above equation equals the function increment  $Q(v_i^+) - Q(v_i)$ . Thus,

$$\|P_{\Omega_i}(v_i + q) - v_i\|^2 \leq 2(Q(v_i^+) - Q(v_i)). \quad (26)$$

Now, taking expectation over the random coordinate  $i$ , we have

$$\frac{1}{n} \|P_\Omega(V + \nabla Q(V)) - V\|^2 = \mathbb{E} \|P_{\Omega_i}(v_i + q) - v_i\|^2 \leq 2\mathbb{E}(Q(v_i^+) - Q(v_i)) = Q(V^{t+1}) - Q(V^t). \quad (27)$$

Further, since  $Q(V^{t+1}) - Q(V^t)$  is monotonic increasing, summing them over iterations 0 to  $T - 1$  forms a telescoping sum, which is upper-bounded by  $Q(V^*) - Q(V^0)$ , where  $V^*$  is the global optimal solution of  $Q(V)$ . Substitute the definition of projected gradient (18), we have

$$\frac{T}{n} \min_t \|\text{grad}(V^t)\|^2 \leq \frac{1}{n} \sum_{t=0}^{T-1} \|\text{grad}(V^t)\|^2 \leq 2(Q(V^*) - Q(V^0)). \quad (28)$$

Thus, the projected gradient  $\text{grad}(V)$  converges to zero at a  $O(1/T)$  rate.  $\square$

<sup>4</sup>Note that in Proposition 1, when  $q \leq 0$  and there are multiple maximum  $q_t$ , we further select the  $t$  with the maximum  $(v_i)_t$  in the previous iteration. This makes the limit to hold on the corner case  $q = 0$ .

## C Proof for Lemma 4

By definition of the projection  $P_\Omega(x + q)$ , we have

$$\|P_\Omega(x + q) - (x + q)\|^2 \leq \|P_\Omega(x + \alpha q) - (x + q)\|^2.$$

Take out the  $q$  term out of the norm and rearrange, there is

$$\|P_\Omega(x + q) - x\|^2 \leq \|P_\Omega(x + \alpha q) - x\|^2 - 2q^T(P_\Omega(x + \alpha q) - P_\Omega(x + q)). \quad (29)$$

Similarly, by definition of the projection  $P_\Omega(x + \alpha q)$ , there is

$$\|P_\Omega(x + \alpha q) - x\|^2 \leq \|P_\Omega(x + q) - x\|^2 - 2\alpha q^T(P_\Omega(x + q) - P_\Omega(x + \alpha q)). \quad (30)$$

Sum (29) and (30), the norms cancel, and we have

$$2(\alpha - 1)q^T(P_\Omega(x + \alpha q) - P_\Omega(x + q)) \geq 0,$$

which implies

$$q^T(P_\Omega(x + \alpha q) - P_\Omega(x + q)) \geq 0. \quad (31)$$

Thus, the result holds.  $\square$

## D Experiments on networks with ground truth

In this section, we compare results from the Leiden-Locale method on data with the ground truth for partitions. The result is listed in Figure 4.

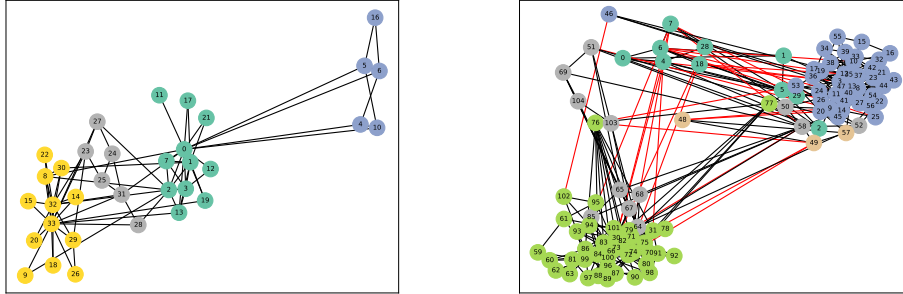

(a) zachary (ground truth = 4 clusters)

(b) polbook (ground truth = 3 clusters)

Figure 4: The comparison of the results from Leiden-Locale method to ground-truth partitions in the zachary and polbook datasets. The position of each node is arranged using the 2D Fruchterman-Reingold force-directed algorithm from the ground-truth using networkx [25], and the color of each node indicates the solution community given by Leiden-Locale algorithm. The red edges between nodes indicates the case when two nodes are inside the same cluster in the ground truth but wasn't assigned so in our algorithm. For zachary, the Leiden-Locale algorithm returns a perfect answer comparing to the ground truth with a perfect modularity of 0.4197 [32]. For polbook, it misclassifies 18 over 105 nodes, but still attains a best known modularity of 0.5272 [2].

## E Pseudo-code for the Leiden-Locale algorithm

Here we list the pseudo-code for the Leiden-Locale method. Note that we reuse Algorithm 2 in Algorithm 3–4 for rounding and refinement by changing its constraint and initialization. And in the actual code, Algorithm 3–4 are combined as a single subroutine.

---

### Algorithm 2 Optimization procedure for the Locale algorithm

---

```

1: procedure LOCALEEMBEDDINGS(Graph  $G$ , Partition  $P$ )
2:   Initialize  $V$  with  $v_i = e(i)$ ,  $i = 1, \dots, n$ .
3:   Initialize the ring queue  $R$  with indices  $i = 1, \dots, n$ .
4:   Let  $z = \sum_{j=1}^n d_j v_j$ .
5:   while not yet converged do
6:      $i = R.pop()$  ▷ Pick an index from the ring queue
7:      $\nabla Q(v_i) = \sum_{j \in P(i)} a_{ij} v_j - \frac{d_i}{2m} (z - d_i v_i)$  ▷ Sums only  $j$  in the same partition of  $i$ 
8:      $g_i = \begin{cases} e(t) \text{ with the max } (\nabla Q(v_i))_t, & \text{if } \nabla Q(v_i) \leq 0, \\ \text{top}_k^+(\nabla Q(v_i)), & \text{otherwise.} \end{cases}$ 
9:      $v_i^{\text{old}} = v_i$ ,  $v_i = g_i / \|g_i\|$  ▷ Perform the closed-form update
10:     $z = z + d_i (v_i - v_i^{\text{old}})$  ▷ Maintain the  $z$ 
11:    Push all neighbors  $j$  with nonzero  $a_{ij}$  into the ring queue  $R$  if it is not already inside.
12:  end while
13:  return the embedding  $V$ 
14: end procedure

```

---



---

### Algorithm 3 Rounding procedure for the Locale algorithm

---

```

1: procedure LOCALEROUNDING(Graph  $G$ , Partition  $P$ , Embedding  $E$ )
2:   Initialize  $V$  with input  $E$ .
3:   Run line 3–12 of Algorithm 2 with cardinality constraint  $k = 1$ .
4:   Let the index of the 1-sparse embedding above be the new partition  $P'$ .
5:   return  $P'$ 
6: end procedure

```

---



---

### Algorithm 4 Refine and Aggregate procedure from the Leiden algorithm

---

```

1: procedure LEIDENREFINEAGGREGATE(Graph  $G$ , Partition  $P$ )
2:   Refine  $P' \leftarrow \text{LocaleRounding}(G, P)$  by restricting the local move within its partition.5
3:   Forms a hypergraph  $G'$  by merging nodes inside the same partitions in  $P'$  and simplify  $P'$ .
4:   done  $\leftarrow |P|$  equals  $|G'|$ .
5:   return  $G'$ ,  $P'$ , done
6: end procedure

```

---

<sup>5</sup>This is the refinement step implemented in the package `python-leiden`.
